# Supplementary material for: Identification and characterization of relapse-initiating cells in MLL-rearranged infant ALL by single-cell transcriptomics
Source: PubMed Central journal article supplement (PMC8727302; doi:10.1038/s41375-021-01341-y), 2021-07-24

Supplementary Figure 2

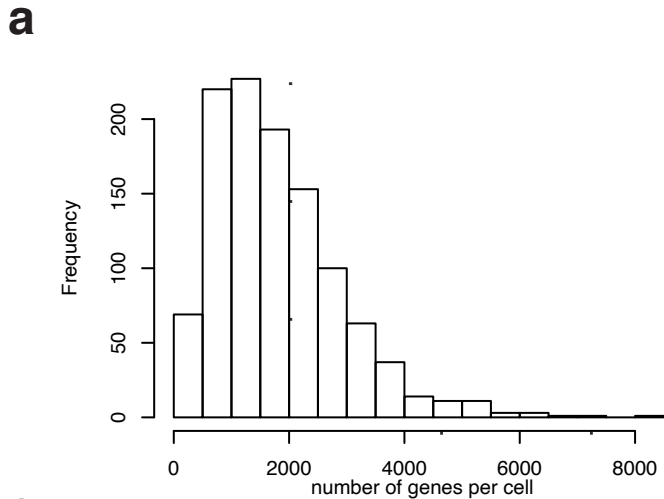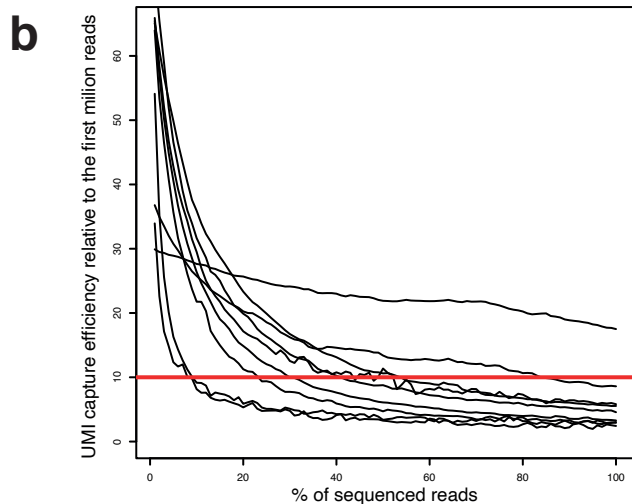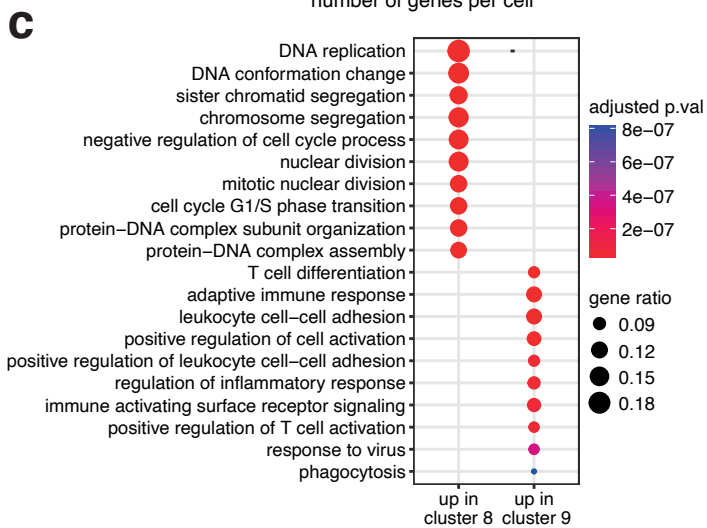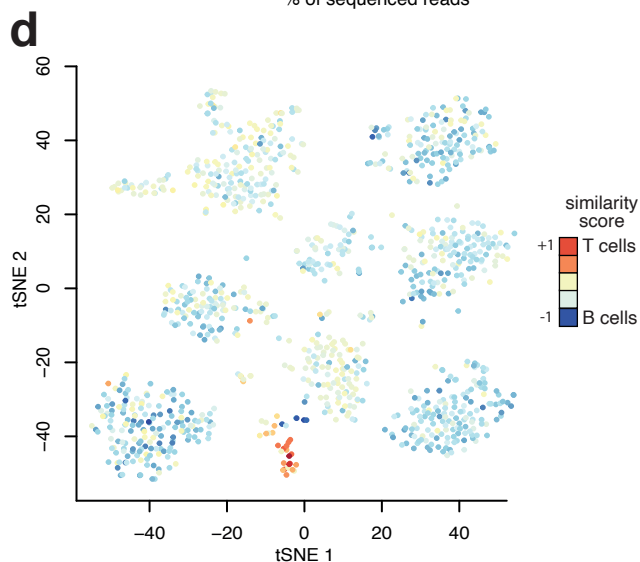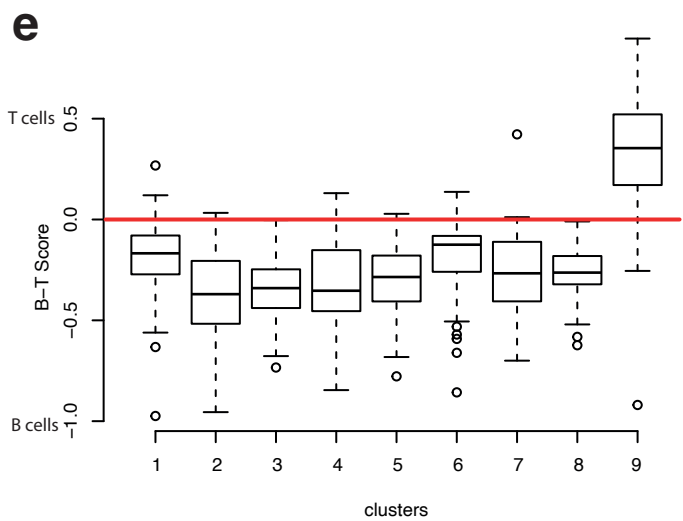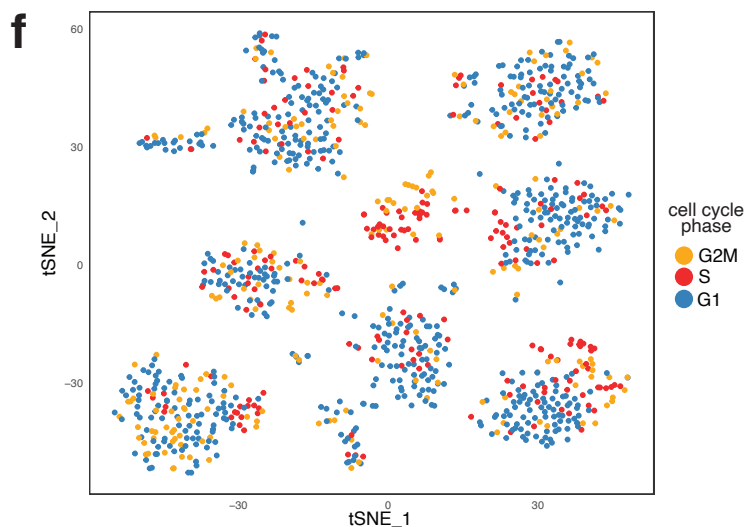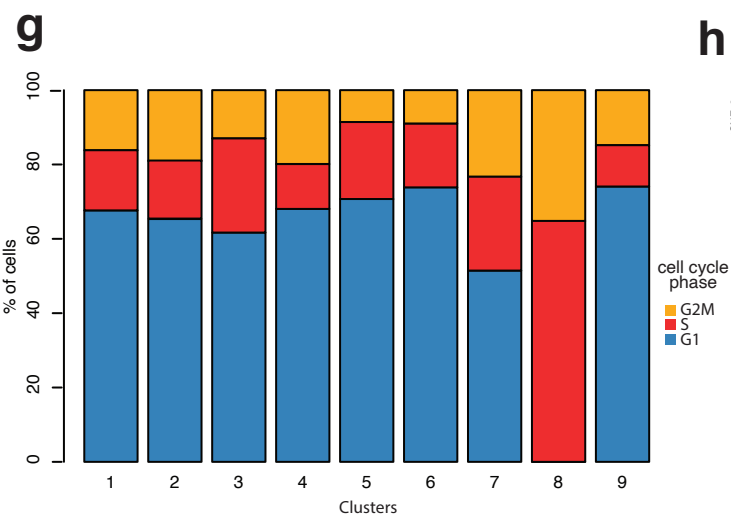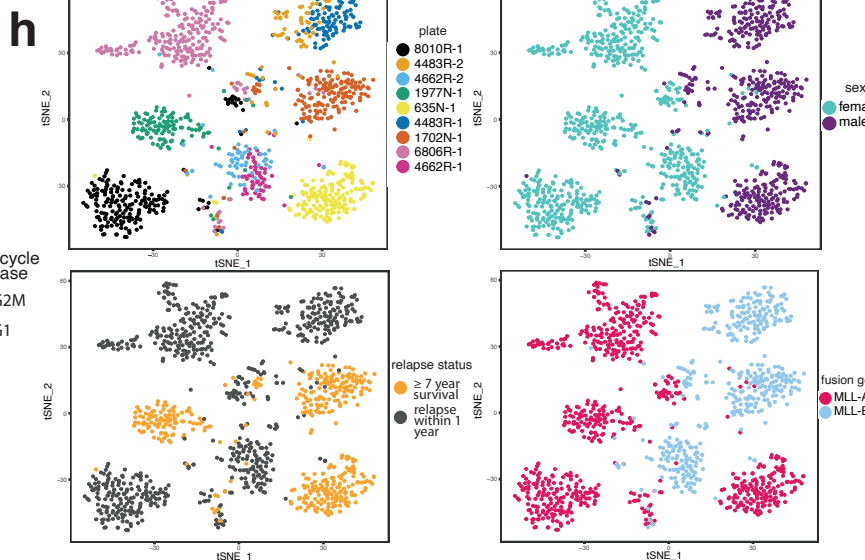

Supplement: 41375_2021_1341_MOESM7_ESM.pdf [file 41375_2021_1341_MOESM7_ESM.pdf]
